# Supplementary material
Source: Springer Nature journal article supplement (https://www.springermedizin.de/resource/supplementary/12885_2010_2169_MOESM6_ESM.pdf/9460676)

**A****24H**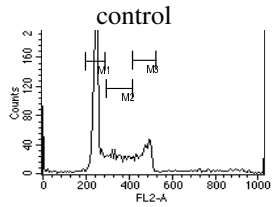

G0/G1;  $50.3 \pm 0.8\%$   
 S;  $20.9 \pm 1.7\%$   
 G2/M;  $19.3 \pm 0.6\%$

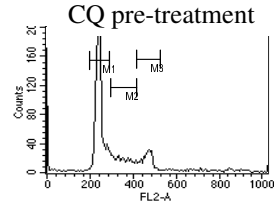

G0/G1;  $64.2 \pm 1.2\%$   
 S;  $15.2 \pm 0.9\%$   
 G2/M;  $12.6 \pm 0.4\%$

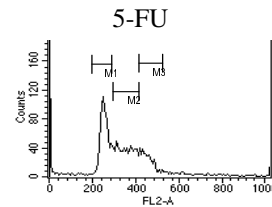

G0/G1;  $38.9 \pm 0.5\%$   
 S;  $37.3 \pm 1.2\%$   
 G2/M;  $14.7 \pm 1.1\%$

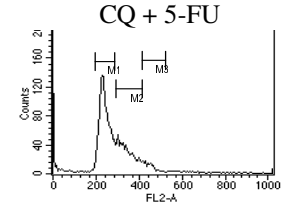

G0/G1;  $59.7 \pm 0.5\%$   
 S;  $26.0 \pm 0.3\%$   
 G2/M;  $5.4 \pm 0.4\%$  \*

**48H**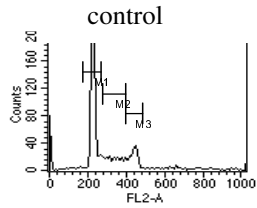

G0/G1;  $71.7 \pm 0.6\%$   
 S;  $13.3 \pm 1.9\%$   
 G2/M;  $10.4 \pm 0.2\%$

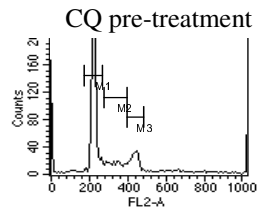

G0/G1;  $69.1 \pm 3.3\%$   
 S;  $12.2 \pm 0.4\%$   
 G2/M;  $12.0 \pm 0.4\%$

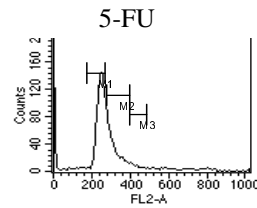

G0/G1;  $65.1 \pm 5.3\%$   
 S;  $20.2 \pm 3.8\%$   
 G2/M;  $2.9 \pm 0.2\%$

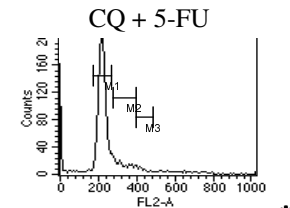

G0/G1;  $79.0 \pm 1.0\%$  \*  
 S;  $10.9 \pm 2.2\%$   
 G2/M;  $2.7 \pm 0.5\%$

**B**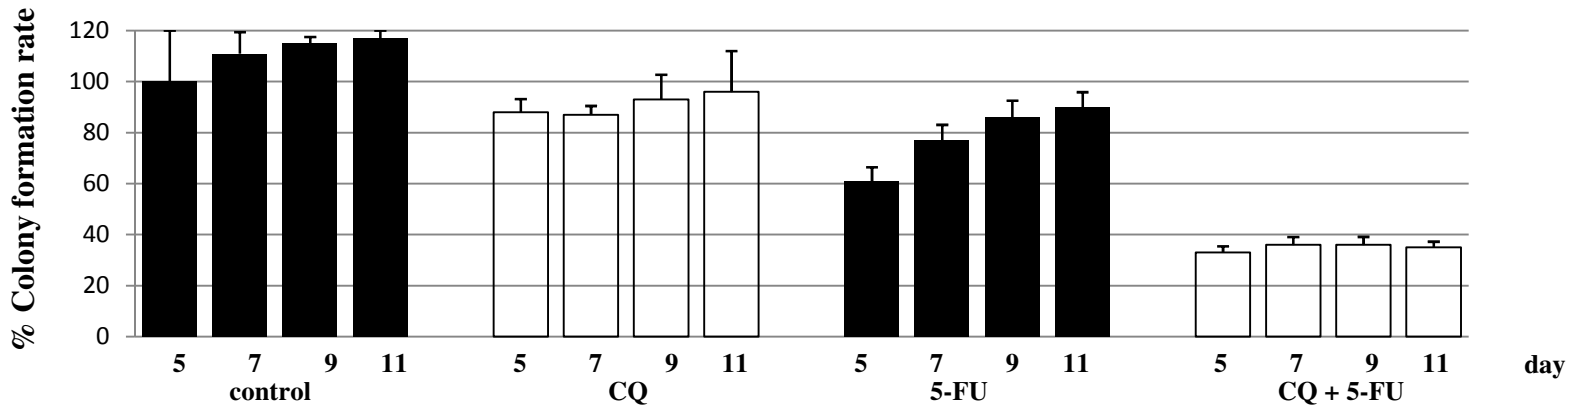

Supplement: MOESM6 [file 9460676]
